# Supplementary material for: Type I Interferon Induction Is Detrimental during Infection with the Whipple's Disease Bacterium, Tropheryma whipplei
Source: PubMed Central journal article supplement (PMC2798751; doi:10.1371/journal.ppat.1000722), 2010-01-15

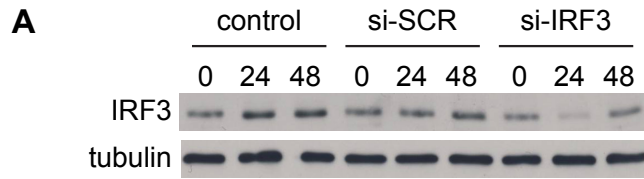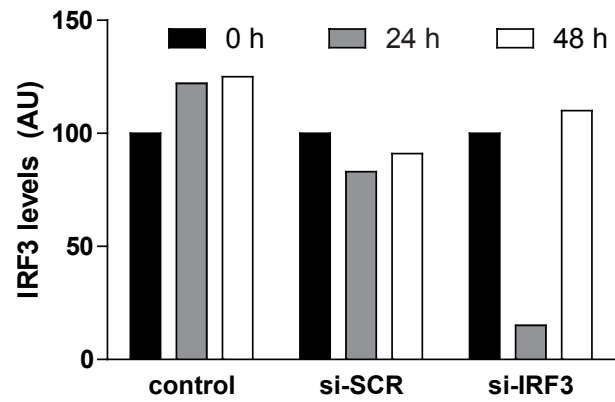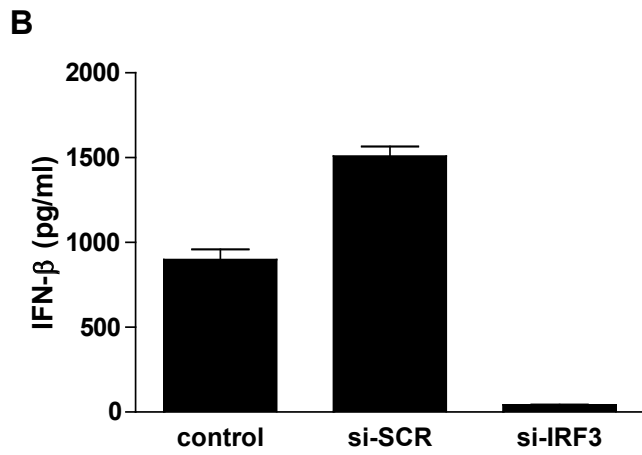

Supplement: ppat.1000722.s002.pdf [file ppat.1000722.s002.pdf]
